# Supplementary material
Source: Springer Nature journal article supplement (https://www.springermedizin.de/resource/supplementary/12936_2012_2429_MOESM3_ESM.pdf/9542942)

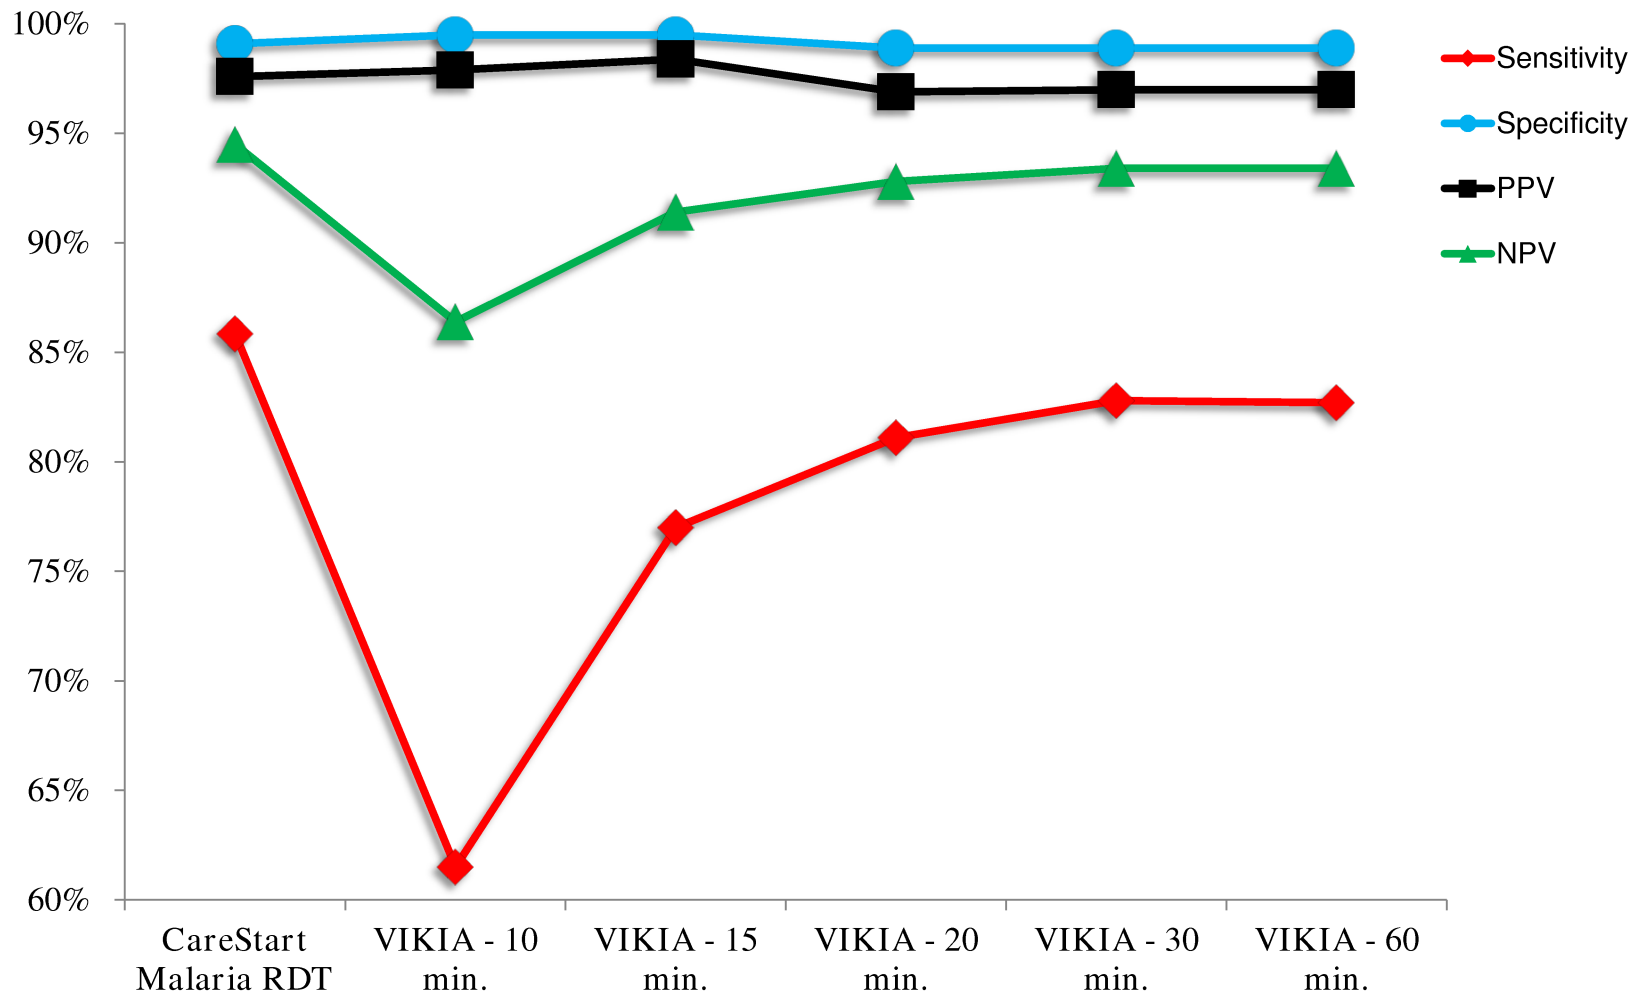

PPV: Positive predictive value; NPV: Negative predictive value

Supplement: MOESM3 [file 9542942]
